# Supplementary material for: An efficient strategy to boost the directed migration of photogenerated holes by introducing phthalocyanine as a hole extraction layer
Source: Royal Society of Chemistry journal article supplement (doi:10.1039/d2qi00701k), 2022-01-01
Supplement: d2qi00701k1.pdf [file d2qi00701k1.pdf]

# An efficient strategy to boost the directed migration of photogenerated holes by introducing phthalocyanine as a hole extraction layer

Qijing Bu,<sup>a</sup> Qifeng Zhao,<sup>a</sup> Guang Lu,<sup>a</sup> Xixi Zhu,<sup>a</sup> Yuexing Zhang,<sup>c</sup> Tengfeng Xie,<sup>\*b</sup>

Qingyun Liu<sup>\*a</sup> and Jianzhuang Jiang<sup>\*d</sup>

<sup>a</sup> College of Chemical and Biological Engineering, Shandong University of Science and Technology, Qingdao 266590, P. R. China

<sup>b</sup> College of Chemistry, Jilin University, Changchun 130012, P. R. China

<sup>c</sup> College of Chemistry and Chemical Engineering, Hubei University, Wuhan 430062, P. R. China

<sup>d</sup> School of Chemistry and Biological Engineering, University of Science and Technology Beijing, Beijing 100083, P. R. China

**Surface photovoltage (SPV) spectra:** SPV spectra based on lock-in amplifier were carried out on a home-made system, which is consisted of a 500 W xenon lamp (LSH-X500, Zolix), a monochromator (Omnik5006, Zolix) and a lock-in amplifier (model SR830-DSP) with an optical chopper (model SR540) running at a frequency of 23 Hz. The construction of the SPV sample cell is a sandwich-like structure of FTO/mica/sample/FTO.

**SPV transient measurements:** SPV transient measurements were performed on a home-made instrument. The sample was excited by the laser radiation pulse with the wavelength of 355 nm from a Nd:YAG laser ((Q-smart 450, Quantel), and the response was collected by the digital phosphor oscilloscope (TDS 5054, Tektronix). The intensity of the pulse was adjusted by a neutral grey filter and measured with a Joule meter (Starlite, Ophir, Inc.).

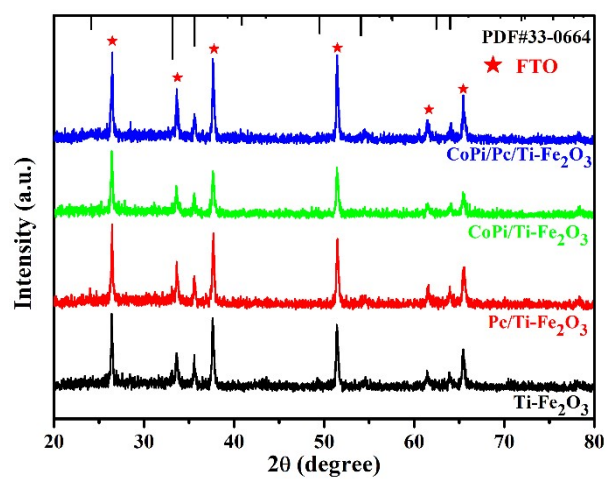

**Figure S1.** XRD patterns of  $\text{Ti-Fe}_2\text{O}_3$ ,  $\text{Pc/Ti-Fe}_2\text{O}_3$ ,  $\text{CoPi/Ti-Fe}_2\text{O}_3$  and  $\text{CoPi/Pc/Ti-Fe}_2\text{O}_3$ .

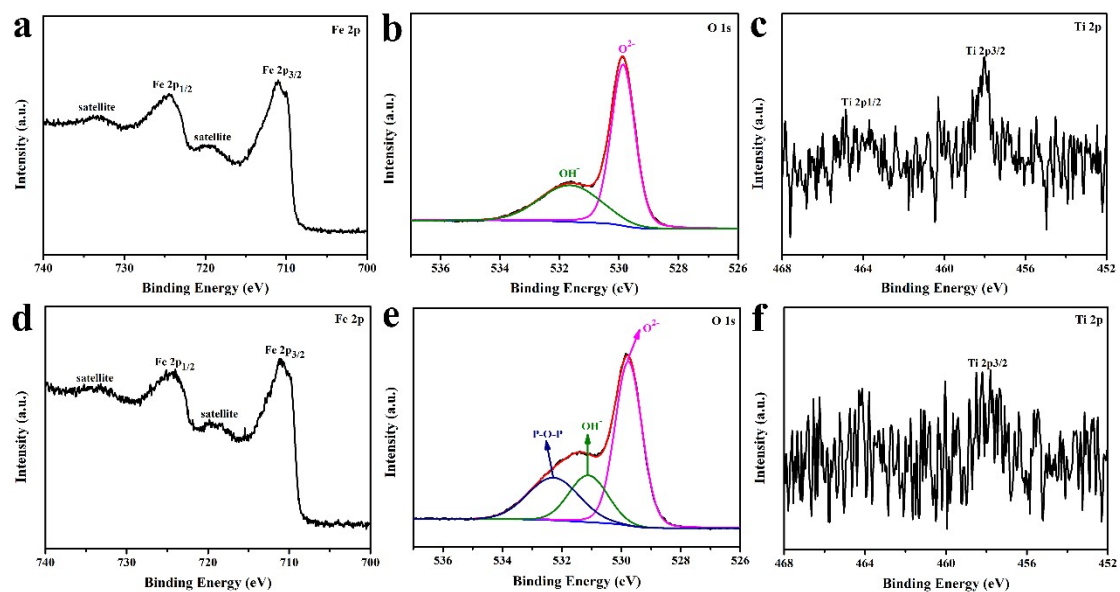

**Figure S2.** XPS spectra of (a) Fe 2p, (b) O 1s, (c) Ti 2p from  $\text{Ti-Fe}_2\text{O}_3$ . XPS spectra of (a) Fe 2p, (b) O 1s, (c) Ti 2p from  $\text{CoPi/Pc/Ti-Fe}_2\text{O}_3$ .

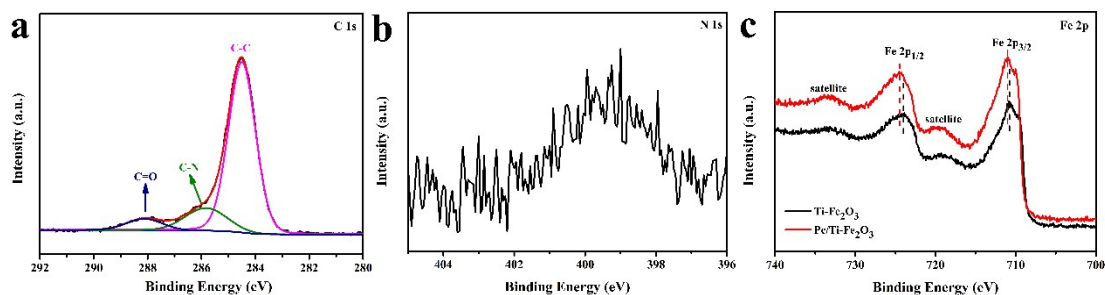

**Figure S3.** XPS spectra of C 1s (a) and N 1s (b) from Pc/Ti-Fe<sub>2</sub>O<sub>3</sub>. (c) XPS spectra of Fe 2p from Ti-Fe<sub>2</sub>O<sub>3</sub> and Pc/Ti-Fe<sub>2</sub>O<sub>3</sub>.

The C 1s XPS spectrum is divided into three peaks at 284.5 eV, 285.9 eV and 288.1 eV, which are assigned to C-C, C-N and C=O of H<sub>2</sub>Pc(COOH)<sub>8</sub>. The N 1s XPS spectrum displays a peak at 399.5 eV, which is indexed to -NH of H<sub>2</sub>Pc(COOH)<sub>8</sub>. The binding energy of Fe 2p is shifted after the introduction of H<sub>2</sub>Pc(COOH)<sub>8</sub>, which indicates the electronic interaction between Pc and Ti-Fe<sub>2</sub>O<sub>3</sub> resulted from the chemical bonding.<sup>1-3</sup> The above results confirm the H<sub>2</sub>Pc(COOH)<sub>8</sub> molecules are bonded with Ti-Fe<sub>2</sub>O<sub>3</sub> successfully.

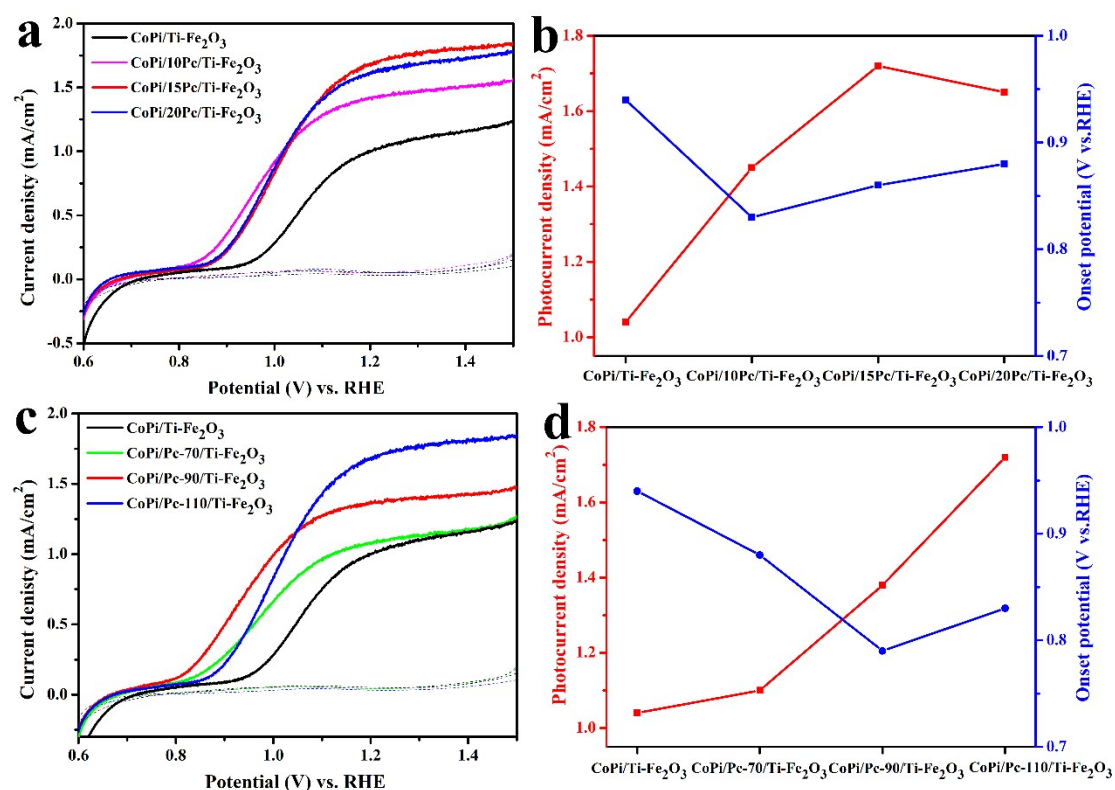

**Figure S4.** (a) Current density-potential (J-V) curves of CoPi/Pc/Ti-Fe<sub>2</sub>O<sub>3</sub> with different concentrations of Pc(COOH)<sub>8</sub> solution. (b) Photocurrent density at 1.23 V vs. RHE and onset potential of CoPi/Pc/Ti-Fe<sub>2</sub>O<sub>3</sub> with different concentrations of Pc(COOH)<sub>8</sub> solution. (c) Current density-potential (J-V) curves of CoPi/Pc/Ti-Fe<sub>2</sub>O<sub>3</sub> with different temperature of hydrothermal reaction. (d) Photocurrent density at 1.23 V vs. RHE and onset potential of CoPi/Pc/Ti-Fe<sub>2</sub>O<sub>3</sub> with different temperature of hydrothermal reaction.

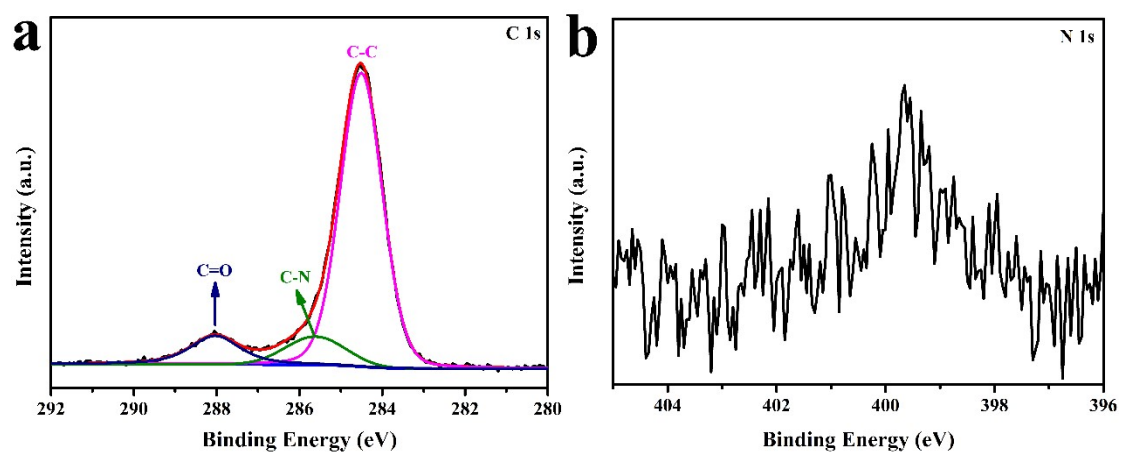

**Figure S5.** The XPS spectra of (a) C 1s and (b) N 1s from CoPi/Pc/Ti-Fe<sub>2</sub>O<sub>3</sub> after the photostability measurement.

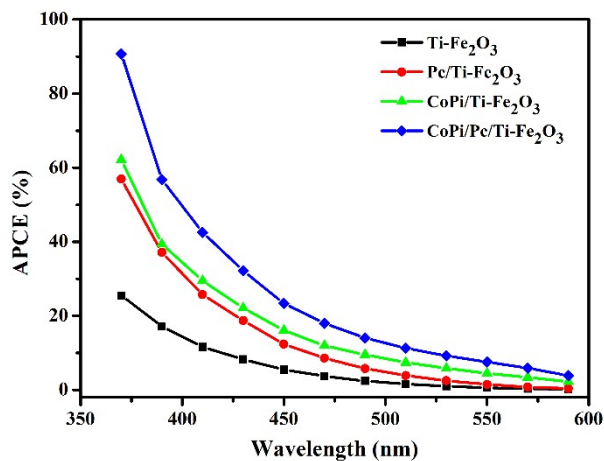

**Figure S6.** The absorbed photon-to-current efficiency (APCE) of Ti-Fe<sub>2</sub>O<sub>3</sub>, Pc/Ti-Fe<sub>2</sub>O<sub>3</sub>, CoPi/Ti-Fe<sub>2</sub>O<sub>3</sub> and CoPi/Pc/Ti-Fe<sub>2</sub>O<sub>3</sub>.

The absorbed photon-to-current efficiency (APCE) was calculated according to the following equation:

$$APCE = \frac{IPCE}{LHE}$$

$$LHE = 1 - 10^{-A(\lambda)}$$

in which  $A(\lambda)$  is the absorbance at wavelength  $\lambda$ .

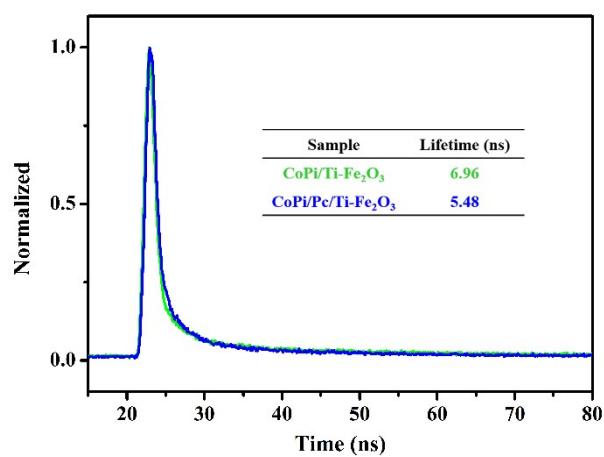

**Figure S7.** The time-resolved photoluminescence (TRPL) decay curves of CoPi/Ti-Fe<sub>2</sub>O<sub>3</sub> and CoPi/Pc/Ti-Fe<sub>2</sub>O<sub>3</sub> with an excitation wavelength of 405 nm.

**Table S1.** Comparison of the photocurrent density of CoPi modified Fe<sub>2</sub>O<sub>3</sub> in the reported literatures with our result at 1.23 V vs. RHE under AM 1.5 G illumination

| Composite                                                                             | Phtocurrent density     | Electrolyte | Ref             |
|---------------------------------------------------------------------------------------|-------------------------|-------------|-----------------|
| CoPi/P-Fe <sub>2</sub> O <sub>3</sub>                                                 | 0.89 mA/cm <sup>2</sup> | 1 M NaOH    | 4               |
| CoPi/Fe <sub>2</sub> O <sub>3</sub> -PN                                               | 1.6 mA/cm <sup>2</sup>  | 0.1 M KOH   | 5               |
| $\alpha$ -Fe <sub>2</sub> O <sub>3</sub> /Sb <sub>2</sub> S <sub>3</sub> /Co-Pi       | 1.14 mA/cm <sup>2</sup> | 1M NaOH     | 6               |
| CoPi/Al <sub>2</sub> O <sub>3</sub> /Ti-Fe <sub>2</sub> O <sub>3</sub>                | 1.32 mA/cm <sup>2</sup> | 1 M KOH     | 7               |
| Co-Pi/h-FeOOH/Fe <sub>2</sub> O <sub>3</sub>                                          | 1.31 mA/cm <sup>2</sup> | 1 M NaOH    | 8               |
| Co-Pi/Fe <sub>2</sub> O <sub>3</sub> -NaBH <sub>4</sub>                               | 1.29 mA/cm <sup>2</sup> | 1 M NaOH    | 9               |
| Fe <sub>2</sub> O <sub>3</sub> /R-CN/CoPi                                             | 0.7 mA/cm <sup>2</sup>  | 1 M NaOH    | 10              |
| CoPi/H <sub>2</sub> -TiO <sub>2</sub> /H <sub>2</sub> -Fe <sub>2</sub> O <sub>3</sub> | 6.0 mA/cm <sup>2</sup>  | 1 M KOH     | 11              |
| Fe <sub>2</sub> O <sub>3</sub> /FeB/CoPi                                              | 1.9 mA/cm <sup>2</sup>  | 1 M NaOH    | 12              |
| CoPi/Co <sub>3</sub> O <sub>4</sub> /Fe <sub>2</sub> O <sub>3</sub>                   | 2.7 mA/cm <sup>2</sup>  | 1 M KOH     | 13              |
| CoPi/Ag/Fe <sub>2</sub> O <sub>3</sub>                                                | 4.68 mA/cm <sup>2</sup> | 1 M NaOH    | 14              |
| CoPi/Pc/Ti-Fe <sub>2</sub> O <sub>3</sub>                                             | 1.72 mA/cm <sup>2</sup> | 1 M KOH     | In this<br>work |

**Table S2.** Theoretical calculation results about HUMO and LOMO of Pc(COOH)<sub>8</sub>

|        | Orbital energy (eV) | Molecular orbital diagrams                                                           |
|--------|---------------------|--------------------------------------------------------------------------------------|
| LUMO+3 | -2.27               | 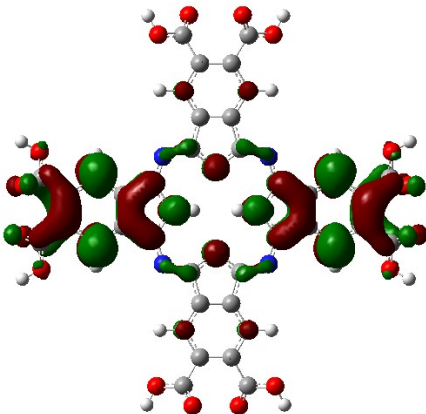   |
| LUMO+2 | -2.77               | 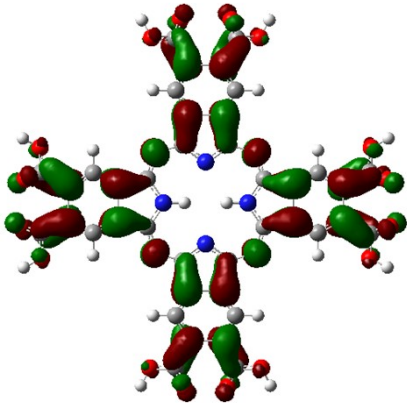  |
| LUMO+1 | -4.05               | 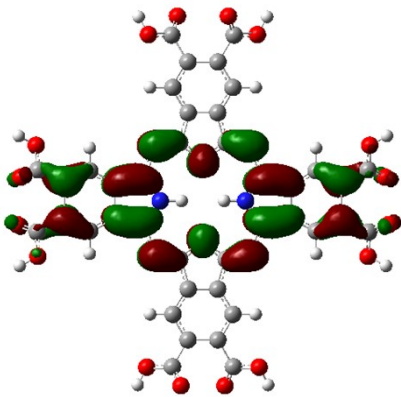 |

---

LUMO

-4.08

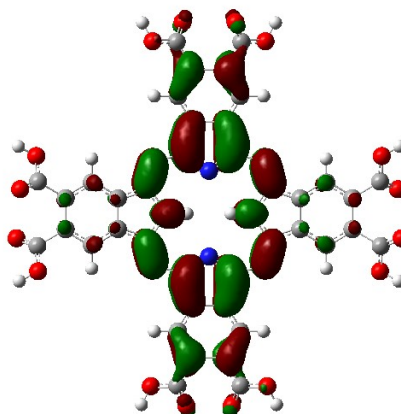

HOMO

-6.18

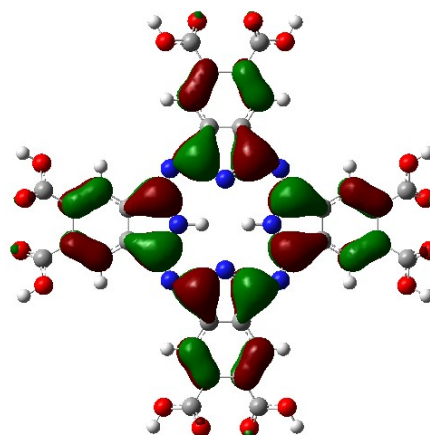

HOMO-1

-7.61

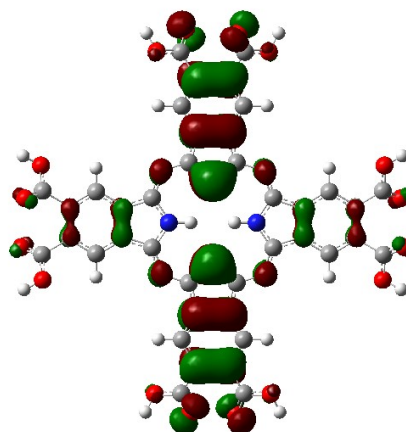

---

HOMO-2

-7.63

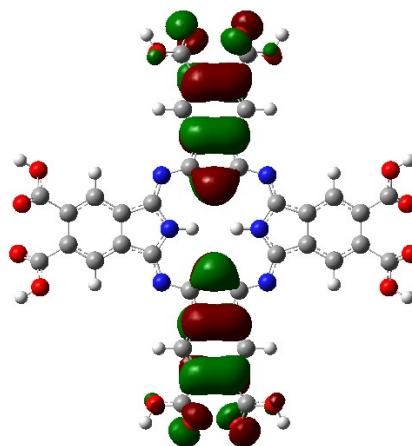

HOMO-3

-7.84

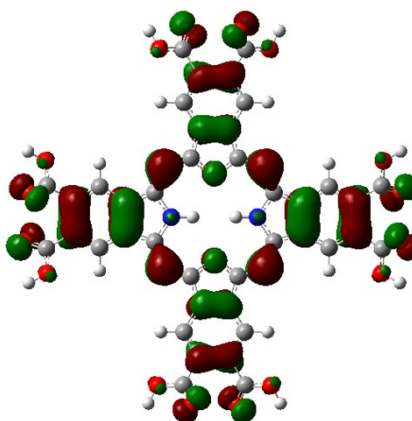

**Table S3.** The binding mode geometry of Ti-Fe<sub>2</sub>O<sub>3</sub> and Pc(COOH)<sub>8</sub>

| Binding energy (kcal/mol) | Multiple perspective structure                                                      |
|---------------------------|-------------------------------------------------------------------------------------|
| -21.71556571              | 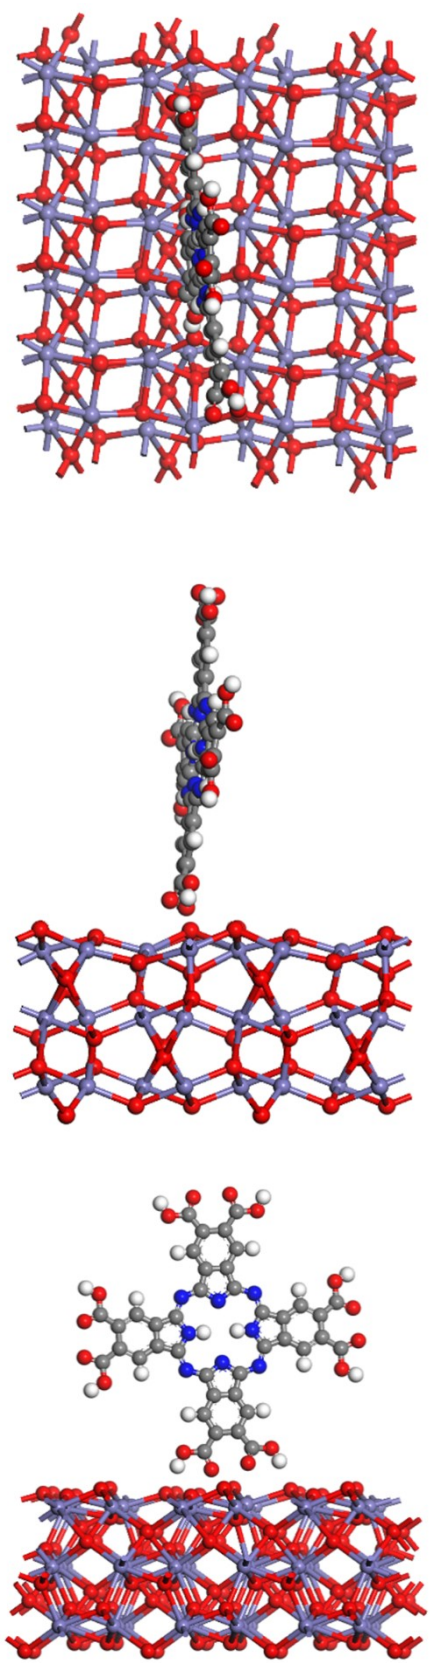 |

---

-22.03046060

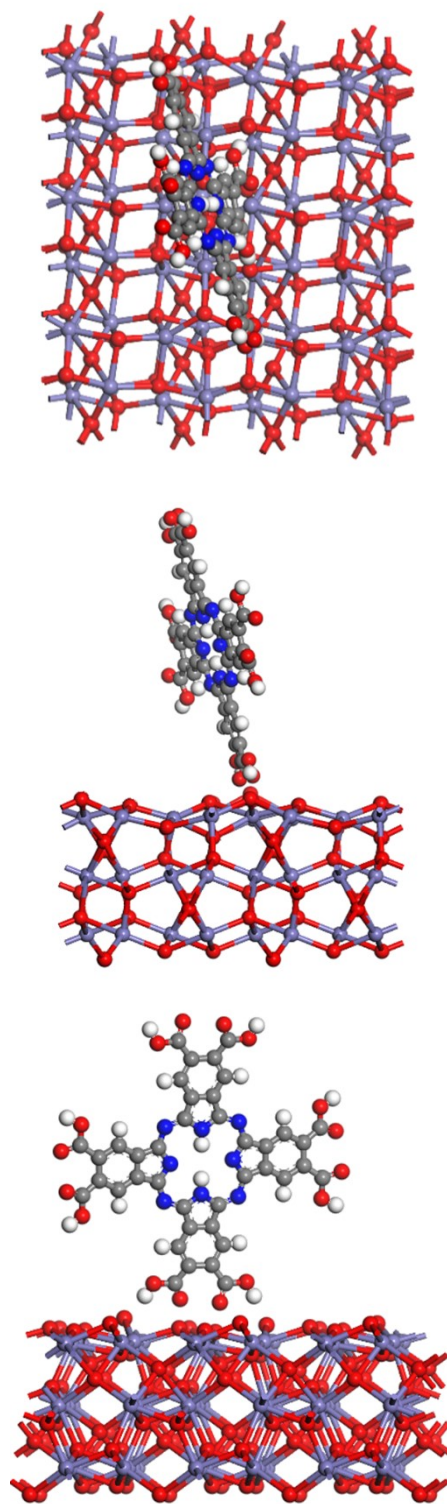

---

-17.80578118

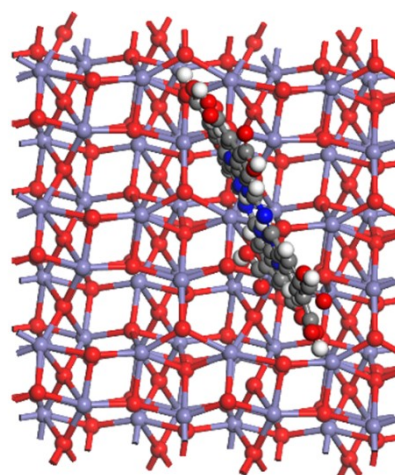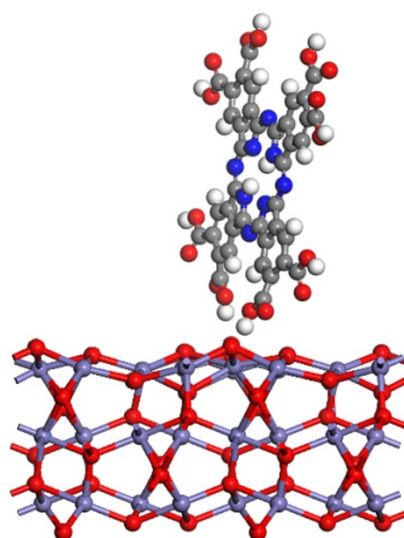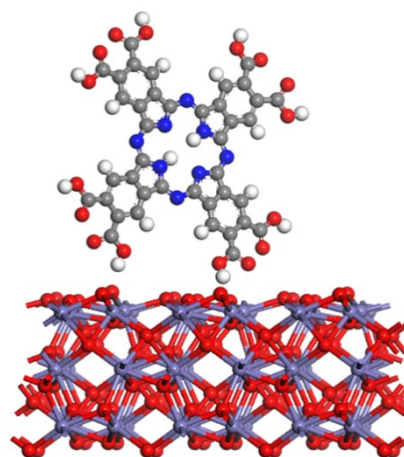

---

-77.95679623

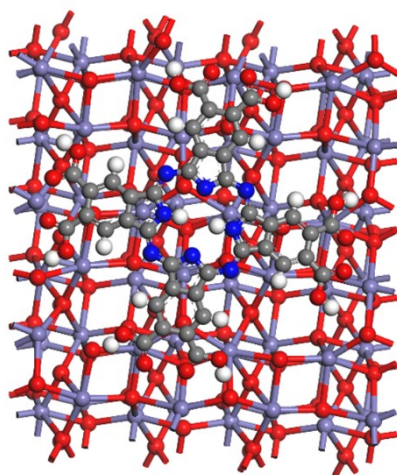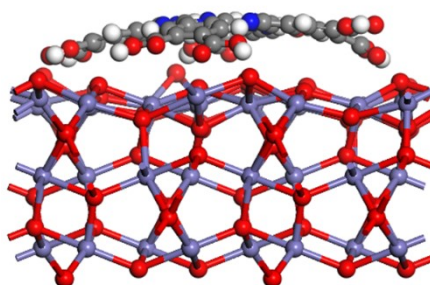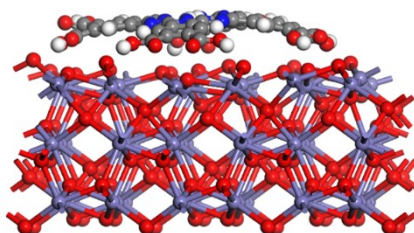

**Table S4.** The fitted resistances of Ti-Fe<sub>2</sub>O<sub>3</sub>, Pc/Ti-Fe<sub>2</sub>O<sub>3</sub>, CoPi/Ti-Fe<sub>2</sub>O<sub>3</sub> and CoPi/Pc/Ti-Fe<sub>2</sub>O<sub>3</sub> photoanodes

| Sample                                    | R <sub>ct1</sub> ( $\Omega$ ) | R <sub>ct2</sub> ( $\Omega$ ) |
|-------------------------------------------|-------------------------------|-------------------------------|
| Ti-Fe <sub>2</sub> O <sub>3</sub>         | 556.6                         | 3151.0                        |
| Pc/Ti-Fe <sub>2</sub> O <sub>3</sub>      | 169.6                         | 758.1                         |
| CoPi/Ti-Fe <sub>2</sub> O <sub>3</sub>    | 139.2                         | 648.1                         |
| CoPi/Pc/Ti-Fe <sub>2</sub> O <sub>3</sub> | 136.2                         | 481.3                         |

## REFERENCE

- (1) Yu, M.-M.; Wang, C.; Li, J.; Yuan, L.; Sun, W.-J. Facile fabrication of CuPp-TiO<sub>2</sub> mesoporous composite: An excellent and robust heterostructure photocatalyst for 4-nitrophenol degradation. *Appl. Surf. Sci.* **2015**, *342*, 47-54.
- (2) Wei, M.; Wan, J.; Hu, Z.; Peng, Z.; Wang, B. Enhanced photocatalytic degradation activity over TiO<sub>2</sub> nanotubes co-sensitized by reduced graphene oxide and copper (II) meso-tetra(4-carboxyphenyl)porphyrin. *Appl. Surf. Sci.* **2016**, *377*, 149-158.
- (3) Gao, H.; Wang, J.; Jia, M.; Yang, F.; Andriamitantsoa, R. S.; Huang, X.; Dong, W.; Wang, G. Construction of TiO<sub>2</sub> nanosheets/tetra (4-carboxyphenyl) porphyrin hybrids for efficient visible-light photoreduction of CO<sub>2</sub>. *Chem. Eng. J.* **2019**, *374*, 684-693.
- (4) Wu, D.; Zhang, Z. Simultaneous non-metal doping and cocatalyst decoration for efficient photoelectrochemical water splitting on hematite photoanodes. *Electrochim. Acta* **2018**, *282*, 48-55.
- (5) Liu, G.; Li, N.; Zhao, Y.; Wang, M.; Yao, R.; Zhao, F.; Wu, Y.; Li, J. Porous versus Compact Hematite Nanorod Photoanode for High-Performance Photoelectrochemical Water Oxidation. *ACS Sustainable Chem. Eng.* **2019**, *7* (13), 11377-11385.
- (6) Chen, D.; Liu, Z.; Zhou, M.; Wu, P.; Wei, J. Enhanced photoelectrochemical water splitting performance of alpha-Fe<sub>2</sub>O<sub>3</sub> nanostructures modified with Sb<sub>2</sub>S<sub>3</sub> and cobalt phosphate. *J. Alloy. Compd.* **2018**, *742*, 918-927.
- (7) Xu, D.; Bu, Q.; Wang, D.; Xie, T. Enhanced photoelectrochemical water oxidation performance by altering the interfacial charge transfer path. *Inorg. Chem. Front.* **2017**, *4* (8), 1296-1303.
- (8) Xiao, J.; Fan, L.; Huang, Z.; Zhong, J.; Zhao, F.; Xu, K.; Zhou, S.-F.; Zhan, G. Functional principle of the synergistic effect of co-loaded Co-Pi and FeOOH on Fe<sub>2</sub>O<sub>3</sub> photoanodes for photoelectrochemical water oxidation. *Chinese J. Catal.* **2020**, *41* (11), 1761-1771.
- (9) Xiao, J.; Fan, L.; Zhao, F.; Huang, Z.; Zhou, S.-F.; Zhan, G. Kinetic analysis of the synergistic effect of NaBH<sub>4</sub> treatment and Co-Pi coating on Fe<sub>2</sub>O<sub>3</sub> photoanodes for photoelectrochemical water oxidation. *J. Catal.* **2020**, *381*, 139-149.
- (10) An, X.; Hu, C.; Lan, H.; Liu, H.; Qu, J. Strongly Coupled Metal

Oxide/Reassembled Carbon Nitride/Co-Pi Heterostructures for Efficient Photoelectrochemical Water Splitting. *ACS Appl. Mater. Interfaces* **2018**, *10* (7), 6424-6432.

(11) Jeon, T. H.; Moon, G.-h.; Park, H.; Choi, W. Ultra-efficient and durable photoelectrochemical water oxidation using elaborately designed hematite nanorod arrays. *Nano Energy* **2017**, *39*, 211-218.

(12) Liao, A.; He, H.; Fan, Z.; Xu, G.; Li, L.; Chen, J.; Han, Q.; Chen, X.; Zhou, Y.; Zou, Z. Facile room-temperature surface modification of unprecedented FeB co-catalysts on Fe<sub>2</sub>O<sub>3</sub> nanorod photoanodes for high photoelectrochemical performance. *Journal Of Catal.* **2017**, *352*, 113-119.

(13) Yi, S.-S.; Wulan, B.-R.; Yan, J.-M.; Jiang, Q. Highly Efficient Photoelectrochemical Water Splitting: Surface Modification of Cobalt-Phosphate-Loaded Co<sub>3</sub>O<sub>4</sub>/Fe<sub>2</sub>O<sub>3</sub> p-n Heterojunction Nanorod Arrays. *A Adv. Funct. Mater.* **2019**, *29* (11), 1801902.

(14) Peerakiatkhajohn, P.; Yun, J.-H.; Chen, H.; Lyu, M.; Butburee, T.; Wang, L. Stable Hematite Nanosheet Photoanodes for Enhanced Photoelectrochemical Water Splitting. *Adv. Mater.* **2016**, *28* (30), 6405-6410.
